# Supplementary material for: Development of a Novel Anti-CD44 Variant 8 Monoclonal Antibody C44Mab-94 against Gastric Carcinomas
Source: MDPI journal article supplement (doi:10.3390/antib12030045), 2023-07-04
Supplement: s1 [file s1]

Table S1, Immunohistochemical analysis using C44Mab-94 and C44Mab-46 against OSCC tissue array.

| No. | Age | Sex | Organ          | Pathology diagnosis   | TNM    | C44Mab-94 | C44Mab-46 |
|-----|-----|-----|----------------|-----------------------|--------|-----------|-----------|
| 1   | 78  | M   | Tongue         | SCC of tongue         | T2N0M0 | ++        | +         |
| 2   | 40  | M   | Tongue         | SCC of tongue         | T2N0M0 | ++        | ++        |
| 3   | 75  | F   | Tongue         | SCC of tongue         | T2N0M0 | ++        | +         |
| 4   | 35  | F   | Tongue         | SCC of tongue         | T2N0M0 | +++       | ++        |
| 5   | 61  | M   | Tongue         | SCC of tongue         | T2N0M0 | +++       | ++        |
| 6   | 41  | F   | Tongue         | SCC of tongue         | T2N0M0 | +++       | +         |
| 7   | 64  | M   | Tongue         | SCC of right tongue   | T2N2M0 | +++       | +         |
| 8   | 76  | M   | Tongue         | SCC of tongue         | T1N0M0 | +++       | +         |
| 9   | 50  | F   | Tongue         | SCC of tongue         | T2N0M0 | +++       | ++        |
| 10  | 44  | M   | Tongue         | SCC of tongue         | T2N1M0 | +++       | ++        |
| 11  | 53  | F   | Tongue         | SCC of tongue         | T1N0M0 | -         | ++        |
| 12  | 46  | F   | Tongue         | SCC of tongue         | T2N0M0 | +         | +         |
| 13  | 50  | M   | Tongue         | SCC of root of tongue | T3N1M0 | ++        | ++        |
| 14  | 36  | F   | Tongue         | SCC of tongue         | T1N0M0 | +++       | +++       |
| 15  | 63  | F   | Tongue         | SCC of tongue         | T1N0M0 | +         | +         |
| 16  | 46  | M   | Tongue         | SCC of tongue         | T2N0M0 | +++       | +         |
| 17  | 58  | M   | Tongue         | SCC of tongue         | T2N0M0 | ++        | +         |
| 18  | 64  | M   | Lip            | SCC of lower lip      | T1N0M0 | +         | ++        |
| 19  | 57  | M   | Lip            | SCC of lower lip      | T2N0M0 | +         | ++        |
| 20  | 61  | M   | Lip            | SCC of lower lip      | T1N0M0 | ++        | +         |
| 21  | 60  | M   | Gum            | SCC of gum            | T3N0M0 | ++        | +         |
| 22  | 60  | M   | Gum            | SCC of gum            | T1N0M0 | +++       | +++       |
| 23  | 69  | M   | Gum            | SCC of upper gum      | T3N0M0 | +         | ++        |
| 24  | 53  | M   | Bucca cavioris | SCC of bucca cavioris | T2N0M0 | ++        | +         |
| 25  | 55  | M   | Bucca cavioris | SCC of bucca cavioris | T1N0M0 | ++        | +         |
| 26  | 58  | M   | Tongue         | SCC of base of tongue | T1N0M0 | +         | +         |
| 27  | 63  | M   | Oral cavity    | SCC                   | T1N0M0 | +++       | +         |
| 28  | 48  | F   | Tongue         | SCC of tongue         | T1N0M0 | +++       | +         |
| 29  | 80  | M   | Lip            | SCC of lower lip      | T1N0M0 | +         | +++       |
| 30  | 77  | M   | Tongue         | SCC of base of tongue | T2N0M0 | +++       | ++        |
| 31  | 59  | M   | Tongue         | SCC of tongue         | T2N0M0 | ++        | +         |
| 32  | 77  | F   | Tongue         | SCC of tongue         | T1N0M0 | ++        | +         |
| 33  | 56  | M   | Tongue         | SCC of root of tongue | T2N1M0 | ++        | +         |

|    |    |   |                |                       |        |     |     |
|----|----|---|----------------|-----------------------|--------|-----|-----|
| 34 | 60 | M | Tongue         | SCC of tongue         | T2N1M0 | +++ | ++  |
| 35 | 62 | M | Tongue         | SCC of tongue         | T2N0M0 | +++ | +++ |
| 36 | 67 | F | Tongue         | SCC of tongue         | T2N0M0 | +++ | +++ |
| 37 | 47 | F | Tongue         | SCC of tongue         | T2N0M0 | ++  | ++  |
| 38 | 37 | M | Tongue         | SCC of tongue         | T2N1M0 | +   | +   |
| 39 | 55 | F | Tongue         | SCC of tongue         | T2N0M0 | +++ | ++  |
| 40 | 56 | F | Bucca cavioris | SCC of bucca cavioris | T2N0M0 | +   | +   |
| 41 | 49 | M | Bucca cavioris | SCC of bucca cavioris | T1N0M0 | -   | -   |
| 42 | 45 | M | Bucca cavioris | SCC of bucca cavioris | T2N0M0 | -   | +   |
| 43 | 42 | M | Bucca cavioris | SCC of bucca cavioris | T3N0M0 | ++  | +   |
| 44 | 44 | M | Jaw            | SCC of right drop jaw | T1N0M0 | +++ | +++ |
| 45 | 40 | F | Tongue         | SCC of base of tongue | T2N0M0 | -   | +++ |
| 46 | 49 | M | Bucca cavioris | SCC of bucca cavioris | T1N0M0 | +++ | ++  |
| 47 | 56 | F | Tongue         | SCC of base of tongue | T2N0M0 | -   | +   |
| 48 | 42 | M | Bucca cavioris | SCC of bucca cavioris | T3N0M0 | +++ | +++ |
| 49 | 87 | F | Face           | SCC of left face      | T2N0M0 | +   | +   |
| 50 | 50 | M | Gum            | SCC of gum            | T2N0M0 | +   | +++ |

-, No stain; +, Weak intensity; ++, Moderate intensity; +++, Strong intensity.

Table S2, Immunohistochemical analysis using C<sub>44</sub>Mab-94 and C<sub>44</sub>Mab-46 against GC tissue array (BS01012e).

| No. | Age | Sex | Pathology diagnosis     | TNM    | Grade | Stage | C <sub>44</sub> Mab-94 | C <sub>44</sub> Mab-46 |
|-----|-----|-----|-------------------------|--------|-------|-------|------------------------|------------------------|
| 1   | 49  | F   | Adenocarcinoma          | T3N1M0 | 2     | IIB   | -                      | +                      |
| 2   | 68  | M   | Adenocarcinoma          | T3N0M0 | 2     | IIA   | -                      | ++                     |
| 3   | 55  | M   | Adenocarcinoma (sparse) | T4N2M0 | 2     | IIIB  | -                      | -                      |
| 4   | 75  | M   | Adenocarcinoma          | T3N1M0 | 3     | IIB   | -                      | +                      |
| 5   | 60  | F   | Adenocarcinoma          | T2N1M0 | 2     | IIA   | -*                     | -*                     |
| 6   | 48  | F   | Adenocarcinoma          | T3N2M0 | 3     | IIIA  | +                      | +++                    |
| 7   | 66  | M   | Adenocarcinoma          | T3N0M0 | 2     | IIA   | -                      | -*                     |
| 8   | 55  | F   | Adenocarcinoma          | T2N0M0 | 1--2  | IB    | -                      | ++                     |
| 9   | 47  | F   | Adenocarcinoma          | T3N1M0 | 3     | IIB   | -                      | -                      |
| 10  | 61  | M   | Adenocarcinoma          | T3N1M0 | 2     | IIB   | +                      | +                      |
| 11  | 70  | M   | Adenocarcinoma          | T3N1M0 | 3     | IIB   | ++                     | ++                     |
| 12  | 60  | M   | Adenocarcinoma          | T2N1M0 | 2     | IIA   | -                      | +                      |
| 13  | 54  | M   | Adenocarcinoma          | T2N1M0 | 2     | IIA   | -                      | -                      |
| 14  | 72  | M   | Adenocarcinoma          | T2N1M0 | 2     | IIA   | -                      | -                      |
| 15  | 71  | M   | Adenocarcinoma          | T2N1M0 | 2     | IIA   | +                      | +                      |
| 16  | 63  | M   | Adenocarcinoma          | T2N1M0 | 2     | IIA   | -*                     | +                      |
| 17  | 66  | M   | Adenocarcinoma          | T1N2M0 | 2     | IIA   | +                      | +                      |
| 18  | 53  | M   | Adenocarcinoma          | T3N1N0 | 3     | IIB   | -*                     | +                      |
| 19  | 68  | F   | Adenocarcinoma          | T2N1M0 | 2     | IIA   | -                      | -                      |
| 20  | 64  | F   | Adenocarcinoma          | T2N1M0 | 2     | IIA   | -                      | +                      |
| 21  | 50  | F   | Adenocarcinoma          | T3N0M0 | 3     | IIA   | -                      | +                      |
| 22  | 72  | M   | Adenocarcinoma          | T2N0M0 | 2--3  | IB    | -                      | ++                     |
| 23  | 50  | M   | Mucinous adenocarcinoma | T3N0M0 | 3     | IIA   | -                      | -                      |
| 24  | 69  | M   | Adenocarcinoma          | T2N0M0 | 3     | IB    | -                      | ++                     |
| 25  | 59  | M   | Adenocarcinoma          | T2N0M0 | 3     | IB    | -                      | -                      |
| 26  | 35  | M   | Adenocarcinoma          | T3N0M0 | 3     | IIA   | -                      | +                      |
| 27  | 43  | M   | Adenocarcinoma          | T3N1M0 | 3     | IIB   | -                      | +                      |
| 28  | 60  | M   | Mucinous adenocarcinoma | T3N1M0 | 3     | IIB   | ++                     | ++                     |
| 29  | 70  | F   | Adenocarcinoma          | T2N0M0 | 3     | IB    | -                      | -                      |
| 30  | 64  | M   | Adenocarcinoma          | T2N1M0 | 3     | IIA   | +                      | -                      |

|    |    |   |                                                  |        |   |      |     |     |
|----|----|---|--------------------------------------------------|--------|---|------|-----|-----|
| 31 | 45 | M | Adenocarcinoma                                   | T3N1M0 | 3 | IIB  | -   | -   |
| 32 | 35 | F | Adenocarcinoma                                   | T3N2M0 | 3 | IIIA | -   | +   |
| 33 | 57 | M | Adenocarcinoma                                   | T3N1N0 | 3 | IIB  | +   | ++  |
| 34 | 72 | M | Adenocarcinoma                                   | T3N1N0 | 3 | IIB  | .*  | +   |
| 35 | 68 | M | Adenocarcinoma                                   | T3N1N0 | 3 | IIB  | +   | +++ |
| 36 | 72 | F | Adenocarcinoma                                   | T3N0M0 | 3 | IIA  | .*  | ++  |
| 37 | 62 | M | Adenocarcinoma                                   | T2N2M0 | 3 | IIB  | -   | -   |
| 38 | 68 | F | Adenocarcinoma                                   | T2N1M0 | 3 | IIA  | -   | +   |
| 39 | 43 | M | Adenocarcinoma                                   | T2N0M0 | 3 | IB   | -   | +   |
| 40 | 55 | M | Adenocarcinoma                                   | T3N2M0 | 3 | IIIA | +   | +   |
| 41 | 61 | M | Adenocarcinoma                                   | T3N0M0 | 3 | IIA  | -   | -   |
| 42 | 49 | F | Adenocarcinoma                                   | T3N1M0 | 2 | IIB  | +   | +   |
| 43 | 49 | M | Adenocarcinoma                                   | T2N1M0 | 3 | IIA  | -   | +   |
| 44 | 57 | M | Adenocarcinoma                                   | T3N1M0 | 3 | IIB  | -   | -   |
| 45 | 63 | M | Adenocarcinoma                                   | T3N2M0 | 3 | IIIA | -   | +   |
| 46 | 59 | M | Adenocarcinoma (fibrous tissue and blood vessel) | T3N1M0 |   | IIB  | -   | -   |
| 47 | 60 | M | Adenocarcinoma                                   | T2N1M0 | 3 | IIA  | +   | +   |
| 48 | 46 | F | Adenocarcinoma                                   | T3N1M0 | 3 | IIB  | +++ | +++ |
| 49 | 50 | M | Adenocarcinoma                                   | T2N1M0 | 3 | IIA  | ++  | ++  |
| 50 | 63 | M | Adenocarcinoma                                   | T2N1M0 | 3 | IIA  | -   | -   |
| 51 | 37 | F | Adenocarcinoma                                   | T2N2M0 | 3 | IIB  | -   | -   |
| 52 | 45 | M | Adenocarcinoma                                   | T2N1M0 | 3 | IIA  | -   | -   |
| 53 | 34 | M | Adenocarcinoma                                   | T2N1M0 | 3 | IIA  | -   | +   |
| 54 | 54 | M | Adenocarcinoma                                   | T3N1M0 | 3 | IIB  | -   | -   |
| 55 | 64 | M | Adenocarcinoma                                   | T2N1M0 | 3 | IIA  | +   | +   |
| 56 | 40 | M | Adenocarcinoma                                   | T3N2M0 | 3 | IIIA | -   | -   |
| 57 | 68 | M | Mucinous adenocarcinoma                          | T2N1M0 | 3 | IIA  | -   | -   |
| 58 | 33 | M | Mucinous adenocarcinoma                          | T3N1M0 | 3 | IIB  | -   | -   |
| 59 | 70 | M | Adenocarcinoma                                   | T2N0M0 | 3 | IB   | -   | -   |
| 60 | 46 | M | Mucinous adenocarcinoma                          | T3N0M0 | 3 | IIA  | -   | +   |
| 61 | 55 | M | Adenocarcinoma                                   | T3N1M0 | 3 | IIB  | -   | -   |

|    |    |   |                |        |   |      |    |     |
|----|----|---|----------------|--------|---|------|----|-----|
| 62 | 58 | M | Adenocarcinoma | T2N1M0 | 3 | IIA  | -  | +   |
| 63 | 24 | F | Adenocarcinoma | T3N1M0 | 3 | IIB  | +  | -   |
| 64 | 35 | M | Adenocarcinoma | T3N1M0 | 3 | IIB  | -  | +   |
| 65 | 47 | F | Adenocarcinoma | T3N1M0 | 3 | IIB  | +  | +++ |
| 66 | 64 | M | Adenocarcinoma | T2N1M0 | 3 | IIA  | +  | +   |
| 67 | 56 | M | Adenocarcinoma | T3N2M0 | 2 | IIIA | -  | +   |
| 68 | 75 | M | Adenocarcinoma | T2N0M0 | 3 | IB   | -  | +   |
| 69 | 48 | M | Adenocarcinoma | T2N0M0 | 3 | IB   | _* | +   |
| 70 | 48 | M | Adenocarcinoma | T2N0M0 | 3 | IB   | -  | -   |
| 71 | 74 | M | Adenocarcinoma | T2N0M0 | 3 | IB   | +  | ++  |
| 72 | 45 | F | Adenocarcinoma | T4N0M1 | 3 | IV   | ++ | ++  |

\*Nuclear staining was detected.

-, No stain; +, Weak intensity; ++, Moderate intensity; +++, Strong intensity.
